# Supplementary material for: B lymphocytes can be activated to act as antigen presenting cells to promote anti-tumor responses
Source: PLOS journal article supplement (doi:10.1371/journal.pone.0199034), 2018-07-05
Supplement: S2 (10.1371/journal.pone.0199034.s002) [file journal.pone.0199034.s002]

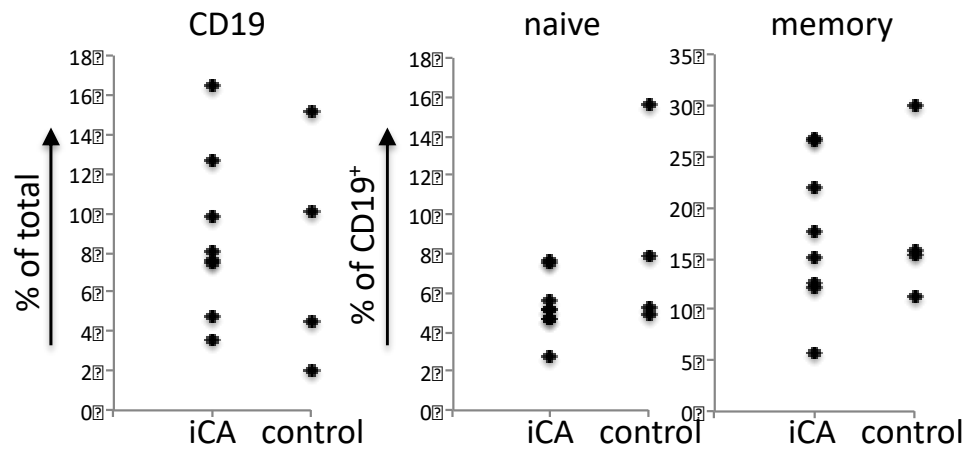

**S2 Fig. Circulating B cells in invasive cancer patients and control subjects.** PBMCs isolated from both invasive cervical cancer patients or age matched control subjects were labeled with anti-CD19, anti-CD38, anti-CD21, anti-CD27, anti-IgD, anti-IgM and analyzed by flow cytometry. The graphs show the percentage of CD19<sup>+</sup> in the total population, and the percentage of naïve and memory cells within the the CD19<sup>+</sup> population. Naïve phenotype was defined as CD19<sup>+</sup>CD27<sup>+</sup>IgD<sup>+</sup> and memory as CD19<sup>+</sup>CD27<sup>+</sup>IgD<sup>-</sup>CD38<sup>-/+</sup>.
